# Supplementary material for: Curdlan-Decorated Fullerenes Mitigate Immune-Mediated Hepatic Injury for Autoimmune Hepatitis Therapeutics via Reducing Macrophage Infiltration
Source: PubMed Central journal article supplement — ACS Appl Mater Interfaces. 2024 Jan 24;16(5):5536–47. doi: 10.1021/acsami.3c16168 (PMC10860698; doi:10.1021/acsami.3c16168), 2024-01-24
Supplement: am3c16168_si_001.pdf [file am3c16168_si_001.pdf]

Supporting Information

# Curdlan Decorated Fullerenes Mitigate Immune-Mediated Hepatic Injury for Autoimmune Hepatitis Therapeutics via Reducing Macrophage Infiltration

*Chenglong Fei<sup>1,2‡</sup>, Lei Liu<sup>1, 3‡</sup>, Hedong Qi<sup>1,3</sup>, Yuyang Peng<sup>1,3</sup>, Jingfen Han<sup>2\*\*</sup>, Chunru Wang<sup>1,3</sup>, Xue Li<sup>1,3\*</sup>*

<sup>1</sup>Key Laboratory of Molecular Nanostructure and Nanotechnology, Beijing National Laboratory for Molecular Sciences, Institute of Chemistry, Chinese Academy of Sciences, Beijing 100190, China

<sup>2</sup>School of Chemistry and Chemical Engineering, Inner Mongolia University, Inner Mongolia 010021, China

<sup>3</sup>University of Chinese Academy of Sciences, Beijing 100049, China

Corresponding Author:

E-mail: hanjingfen@imu.edu.cn (Jingfen Han); lixue01@iccas.ac.cn (Xue Li)



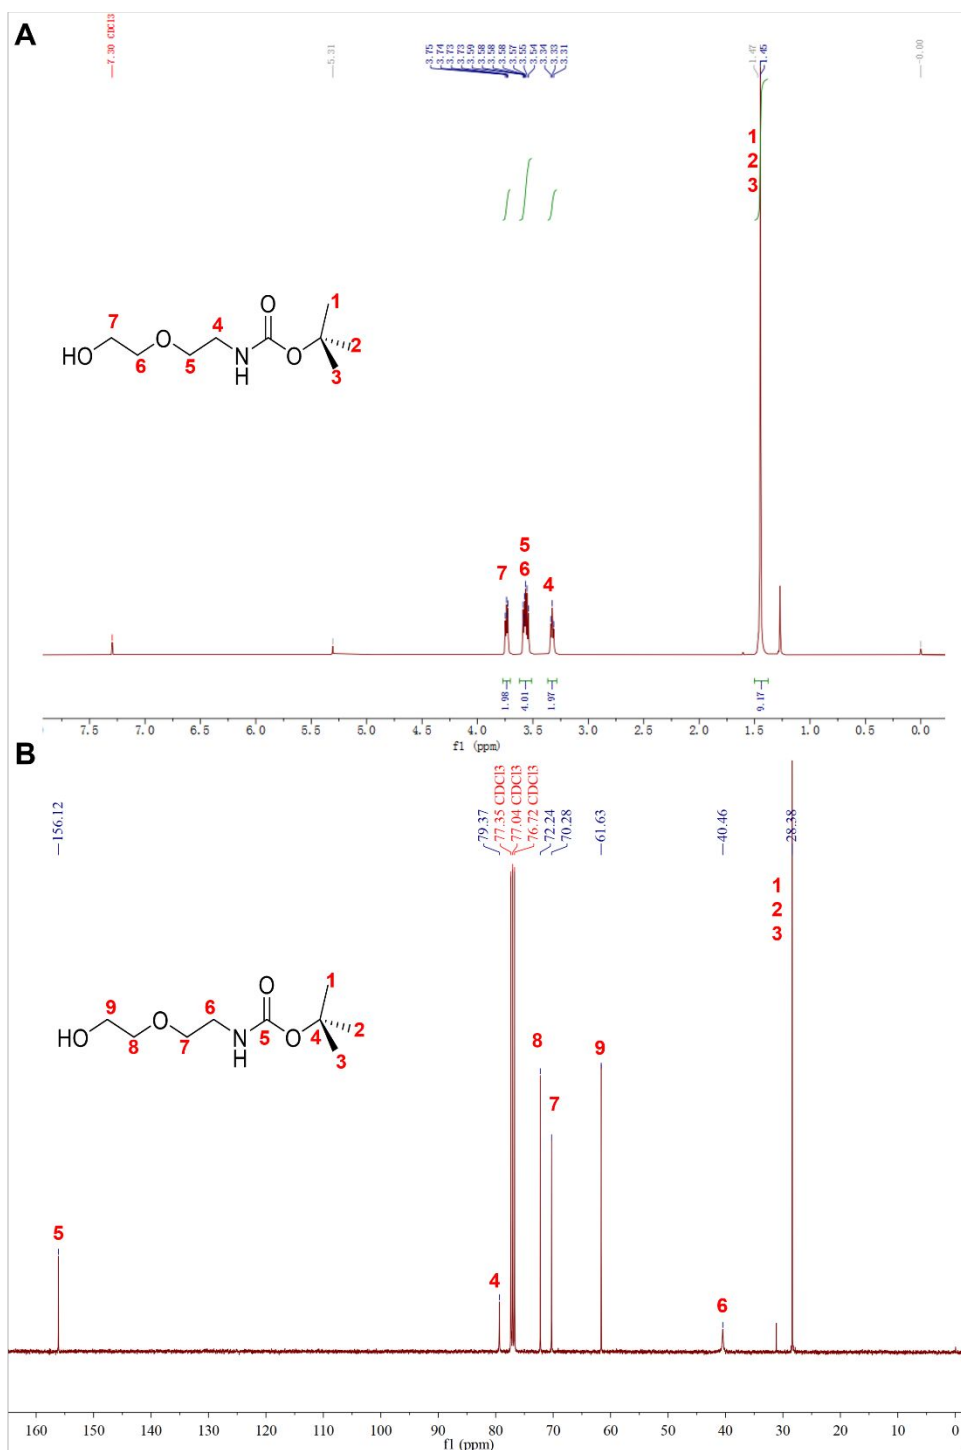

**Figure S1.** <sup>1</sup>H NMR spectrum (400 MHz, CDCl<sub>3</sub>, 301 K). (A) and <sup>13</sup>C NMR spectrum (400 MHz, CDCl<sub>3</sub>, 302 K). (B) of *tert*-butyl (2-(2-hydroxyethoxy)ethyl)carbamate (DGA-BOC).

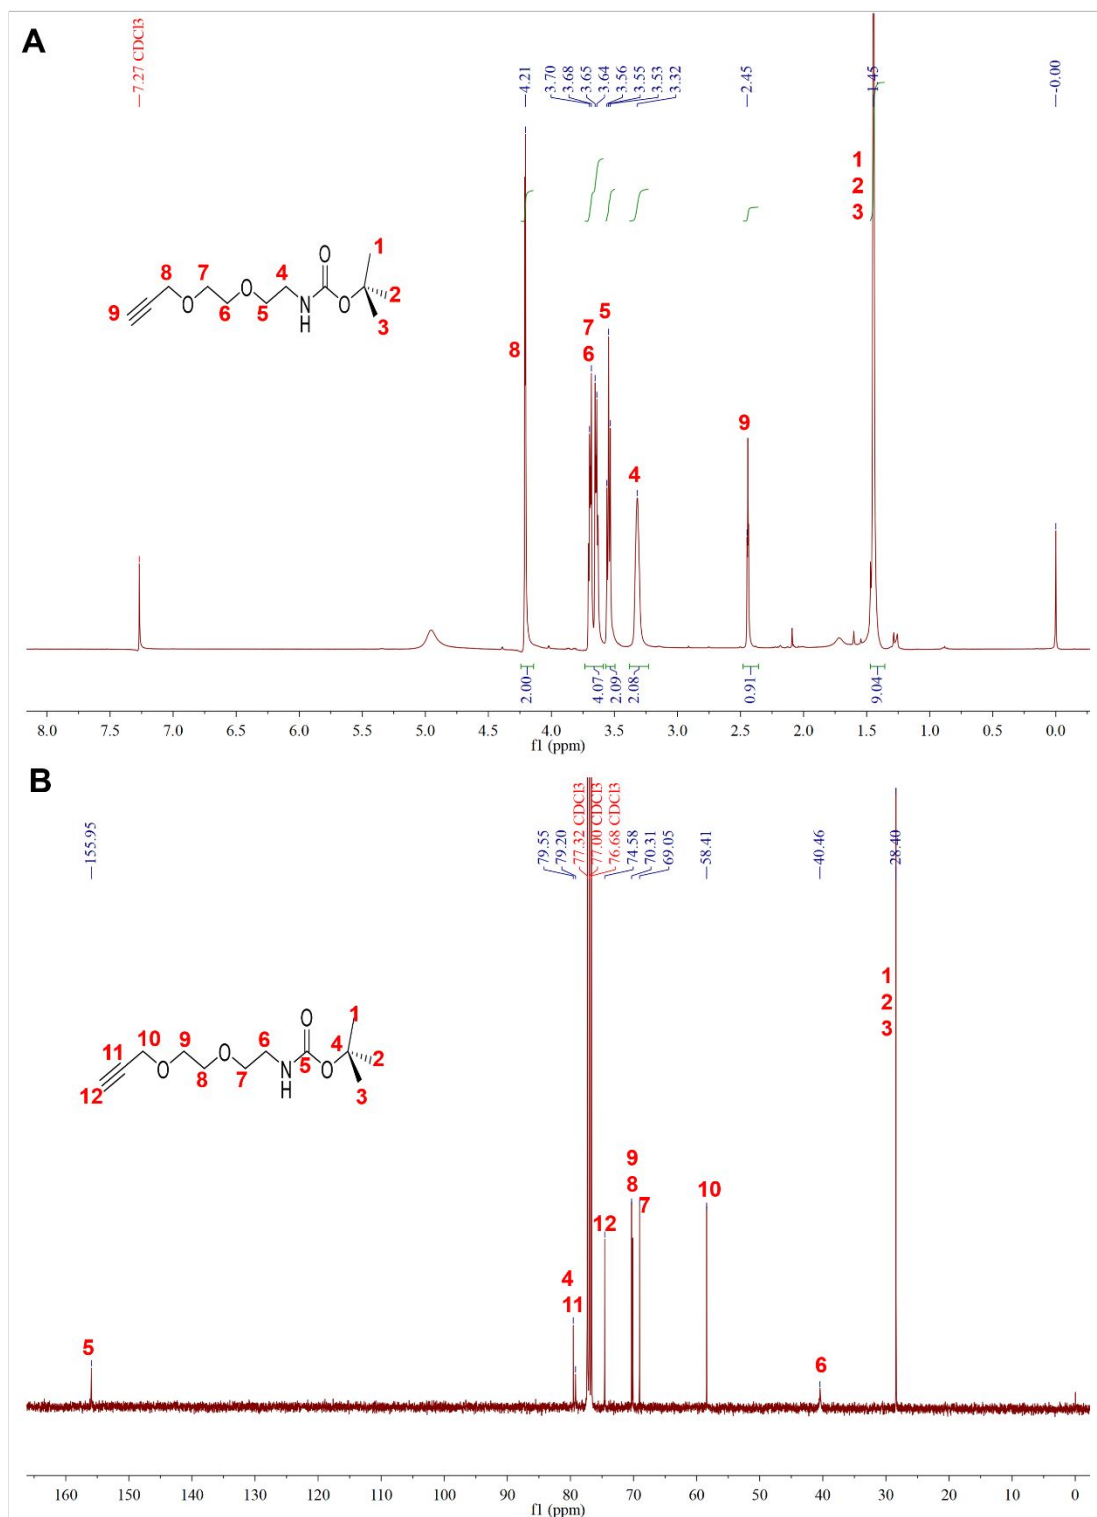

**Figure S2.** <sup>1</sup>H NMR spectrum (400 MHz, CDCl<sub>3</sub>, 298 K). (A) and <sup>13</sup>C NMR spectrum (400 MHz, CDCl<sub>3</sub>, 302 K). (B) of *tert*-butyl (2-(2-(prop-2-yn-1-yloxy)ethoxy)ethyl) carbamate (ALK-DGA-BOC).

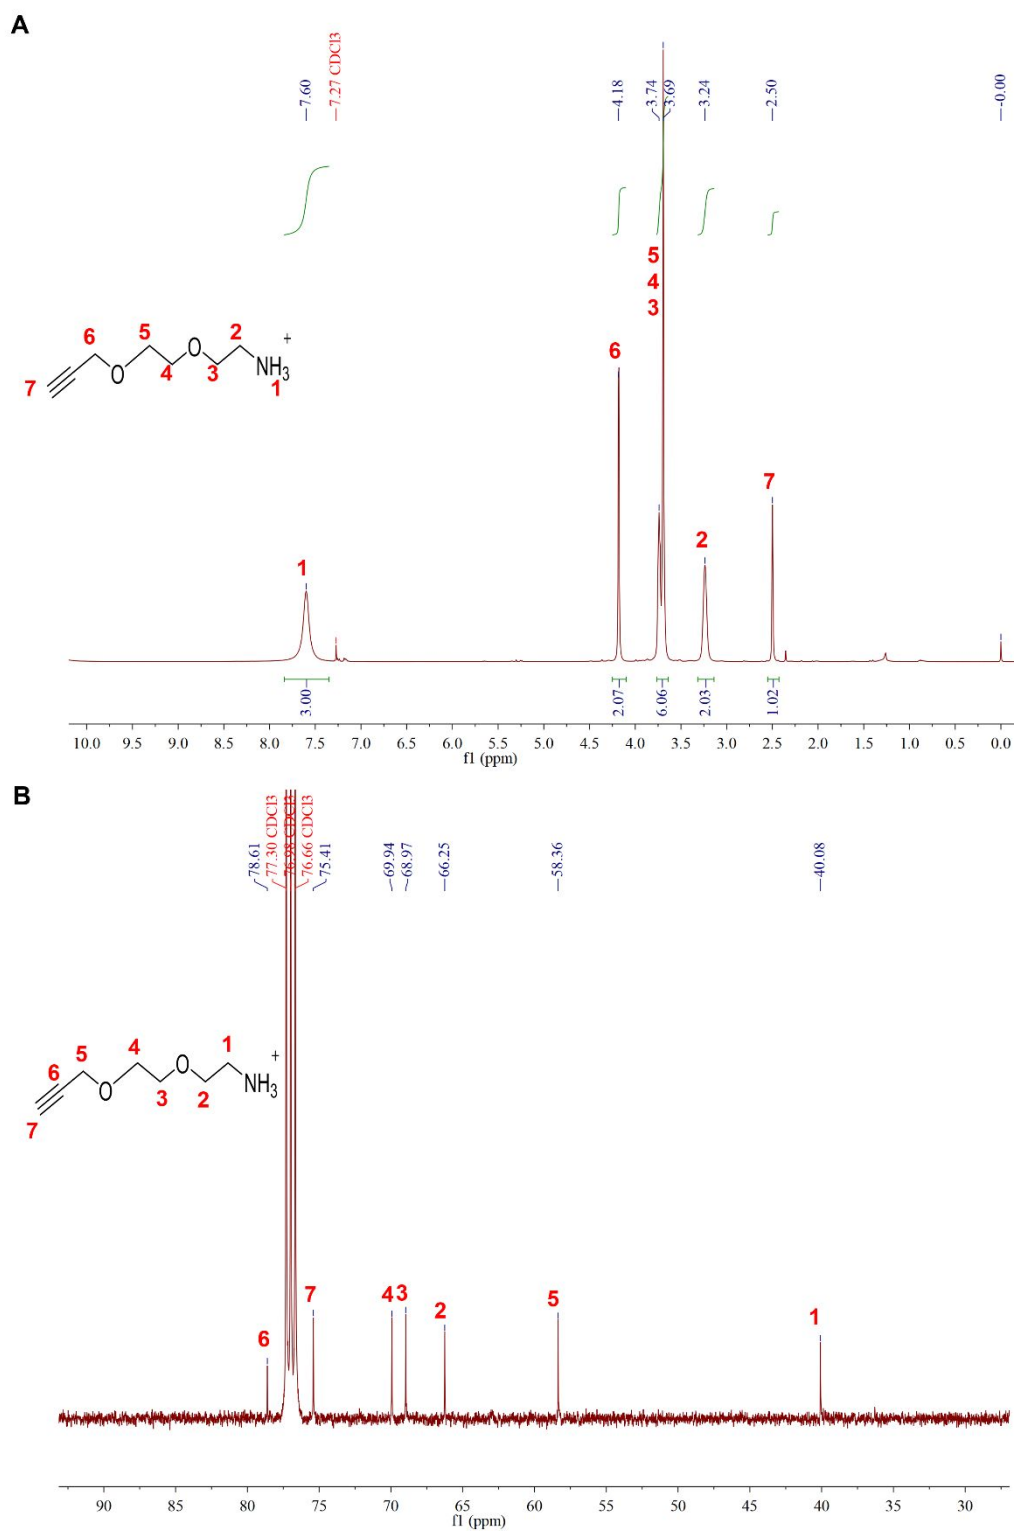

**Figure S3.**  $^1\text{H}$  NMR spectrum (400MHz,  $\text{CDCl}_3$ , 300 K). (A) and  $^{13}\text{C}$  NMR spectrum (400 MHz,  $\text{CDCl}_3$ , 303 K). (B) of 2-(2-(prop-2-yn-1-yloxy)ethoxy)ethan-1-amine (ALK-DGA).

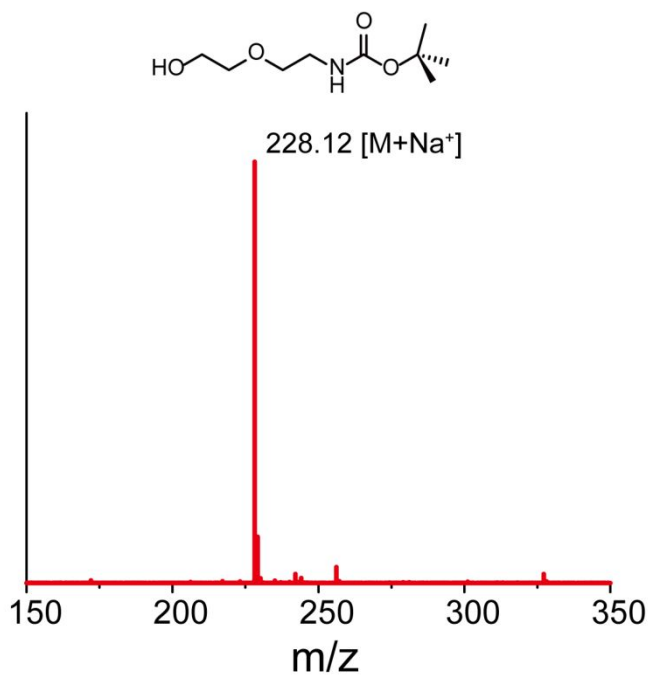

**Figure S4.** ESI mass spectrum of DGA-BOC.

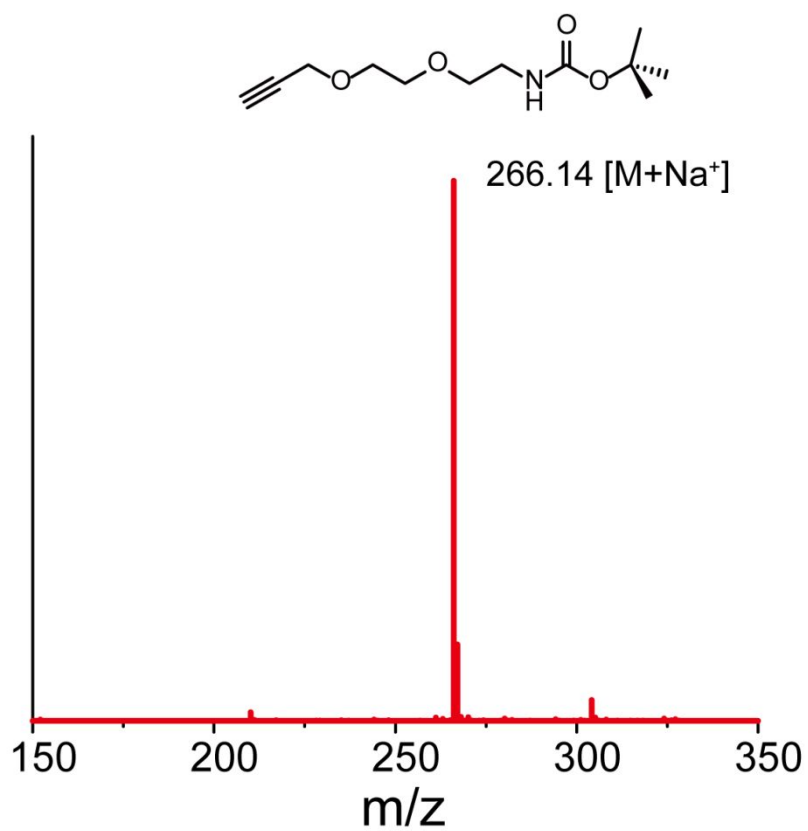

**Figure S5.** ESI mass spectrum of ALK-DGA-BOC.

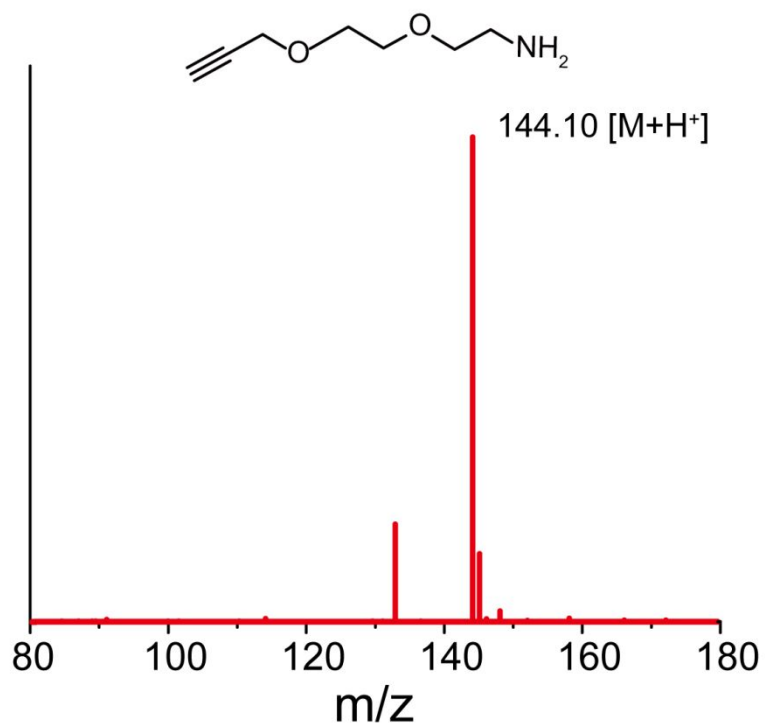

**Figure S6.** ESI mass spectrum of ALK-DGA.



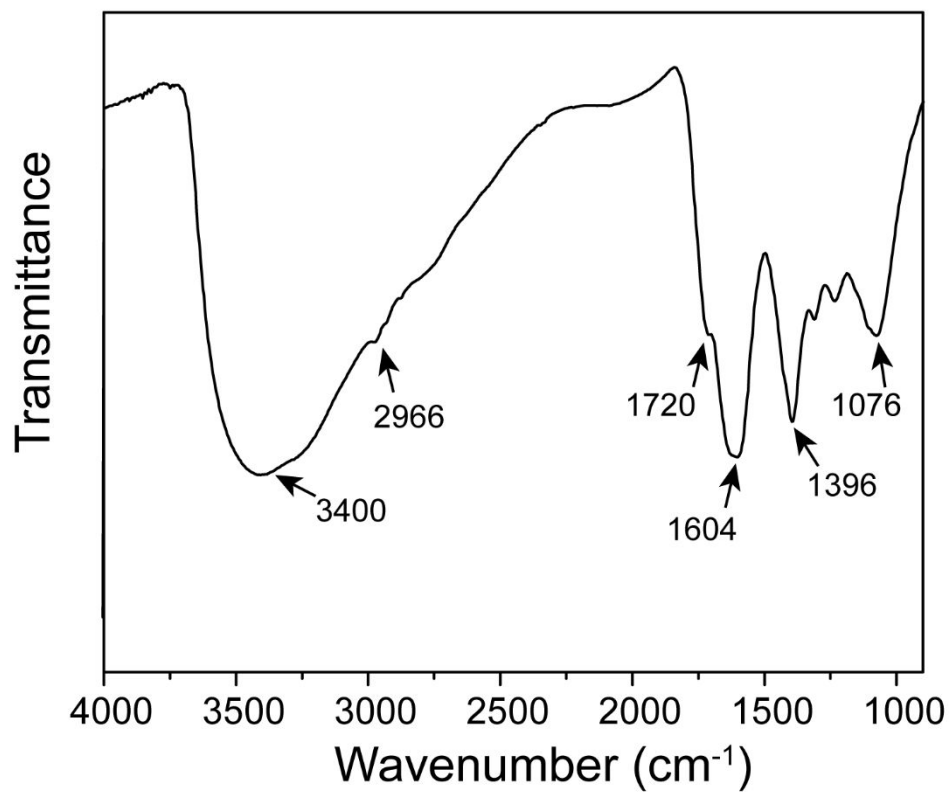

**Figure S7.** Fourier transform-infrared spectroscopy (FT-IR) analysis of F-Gly.

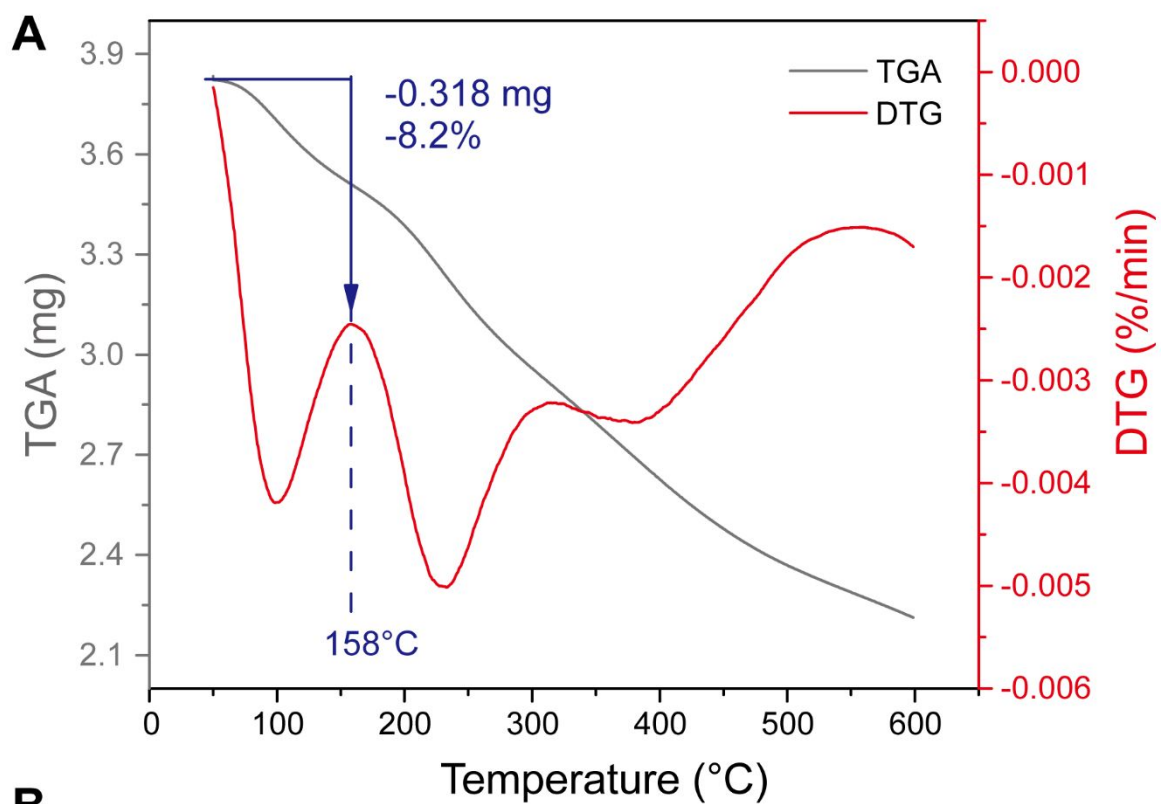

**B**

| Element   | C     | N    | H    |
|-----------|-------|------|------|
| F-Gly (%) | 60.04 | 4.31 | 3.03 |
| Cur-F (%) | 49.15 | 6.53 | 3.67 |

**Figure S8.** (A) Thermogravimetry analysis (TGA) of F-Gly. (B) Elemental analysis of F-Gly and Cur-F.

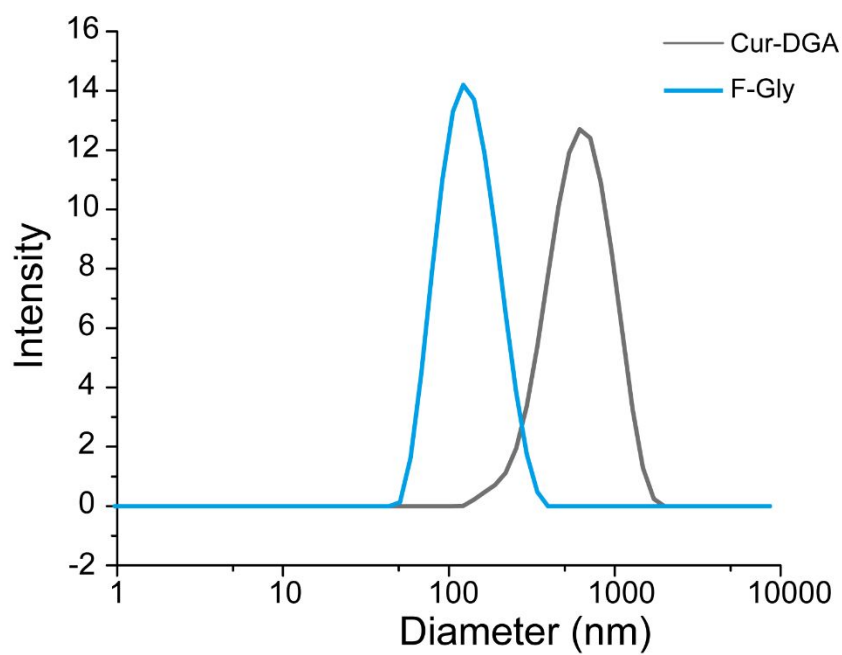

**Figure S9.** Hydrodynamic sizes of Cur-DGA and F-Gly analyzed by DLS.

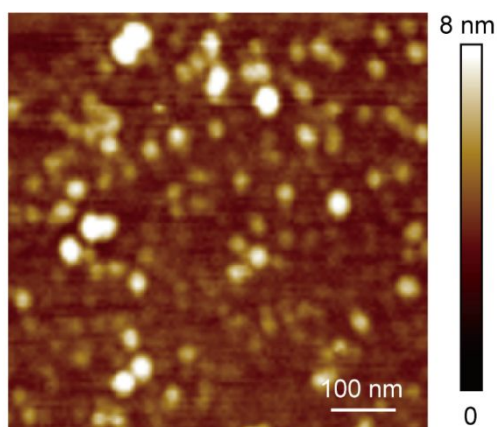

**Figure S10.** AFM image of Cur-F.

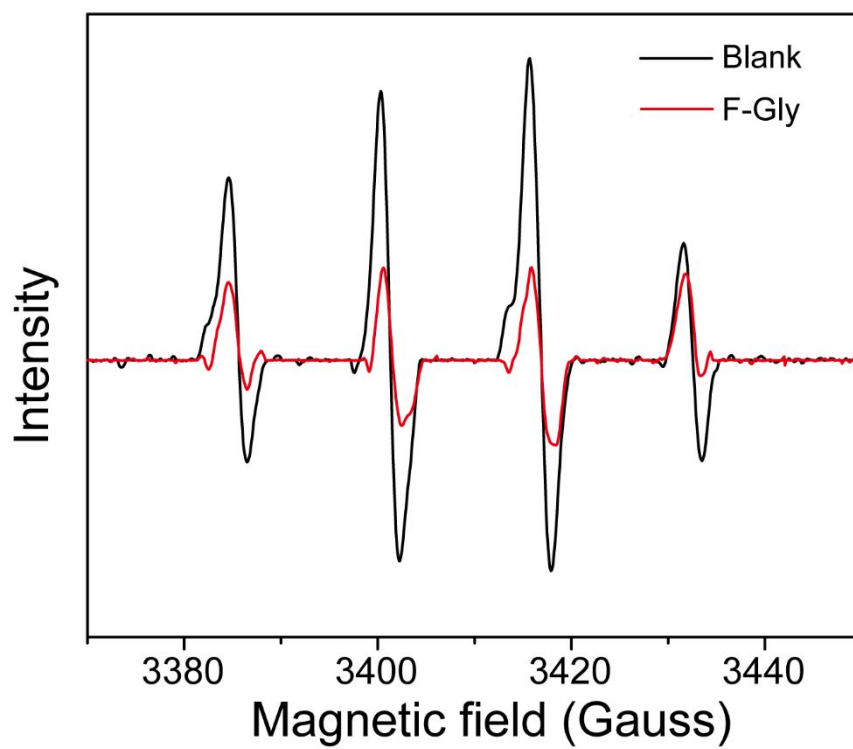

**Figure S11.** EPR of F-Gly.

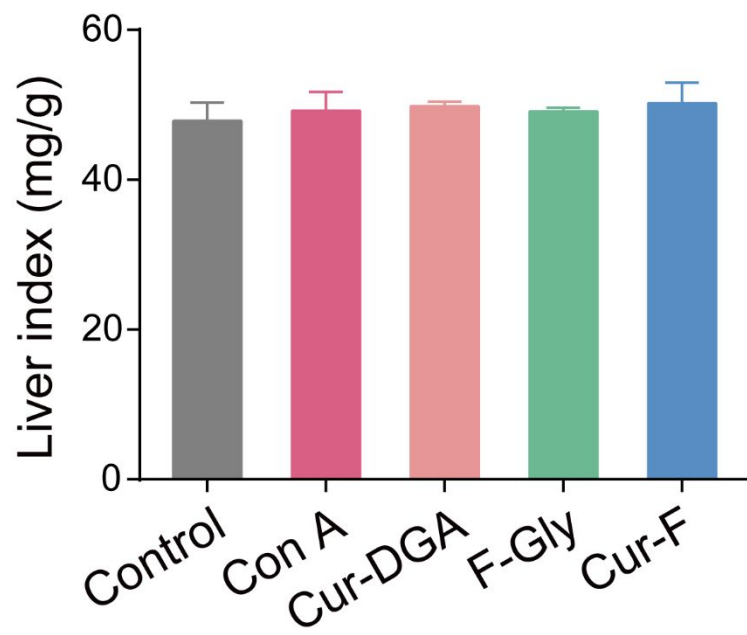

**Figure S12.** Liver index of mice after different treatments.

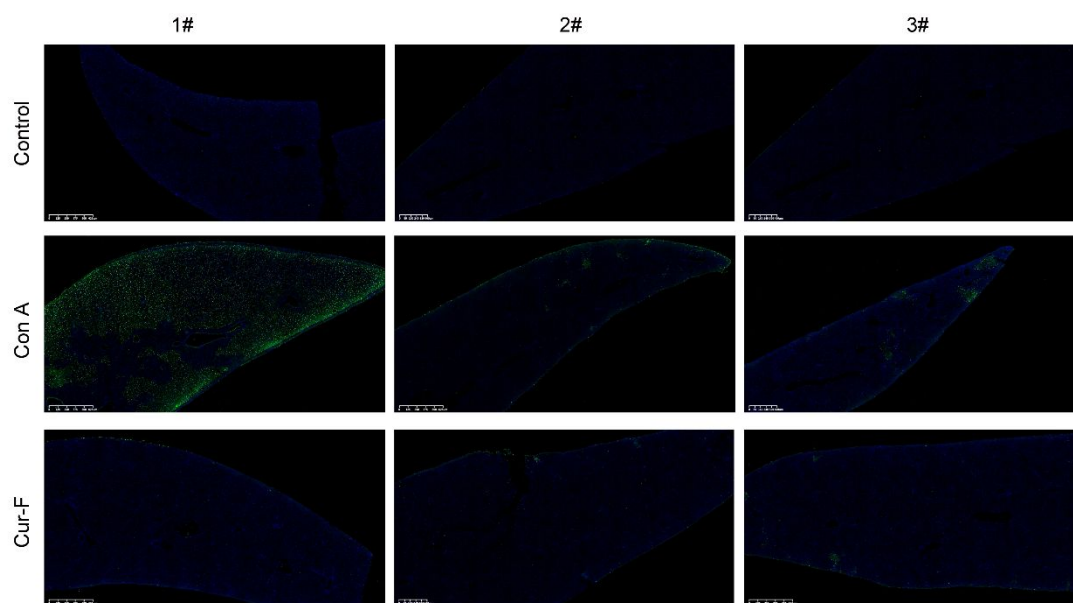

**Figure S13.** TUNEL staining of liver tissues. Green fluorescence indicated TUNEL, and blue fluorescence referred to DAPI.

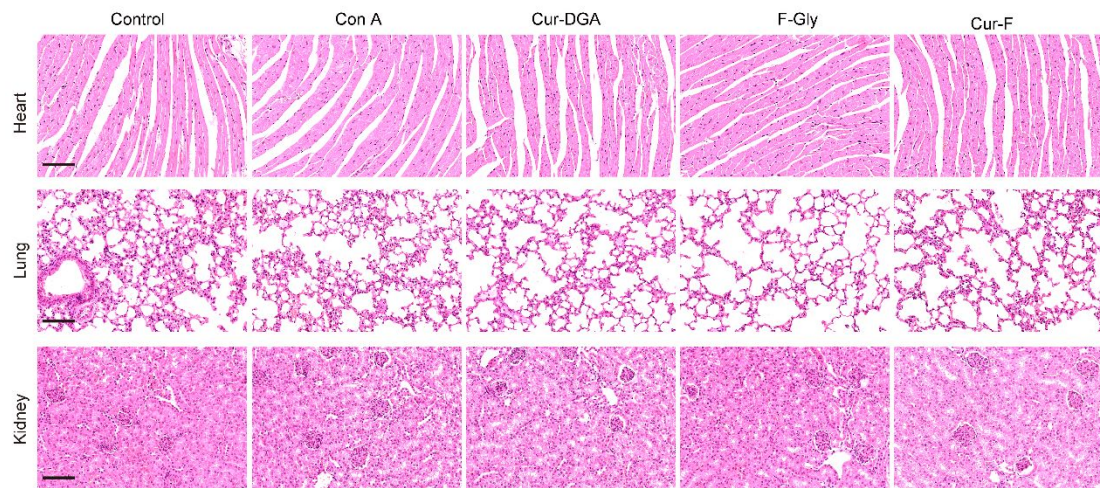

**Figure S14.** H&E staining of heart, lung, and kidney. Scale bar is 100  $\mu\text{m}$ .



**Table S1.** The primers for Q-PCR.

| Target gene            | Primer sequence (5' to 3') |
|------------------------|----------------------------|
| TNF- $\alpha$ Forward  | CTGAACTTCGGGGTGATCGG       |
| TNF- $\alpha$ Reverse  | GGCTTGTCACTCGAATTTTGAGA    |
| IL-1 $\beta$ Forward   | GAAATGCCACCTTTTGACAGTG     |
| IL-1 $\beta$ Reverse   | TGGATGCTCTCATCAGGACAG      |
| IL-6 Forward           | CTGCAAGAGACTTCCATCCAG      |
| IL-6 Reverse           | AGTGGTATAGACAGGTCTGTTGG    |
| NF- $\kappa$ B Forward | AGAGGGGATTTGATTCCGC        |
| NF- $\kappa$ B Reverse | CCTGTGGGTAGGATTTCTTGTTTC   |
